# Supplementary material
Source: PubMed Central journal article supplement (PMC5560071)
Supplement: NIHMS862423-supplement-2.pdf [file NIHMS862423-supplement-2.pdf]

**Supplementary Table 1. List of chemicals**

| Product Name                                                             | Vendor                           | Product number |
|--------------------------------------------------------------------------|----------------------------------|----------------|
| <b>Gelation</b>                                                          |                                  |                |
| Sodium acrylate                                                          | Sigma                            | 408220         |
| Acrylamide                                                               | Sigma                            | A9099          |
| N,N'-Methylenebisacrylamide (BIS)                                        | Sigma                            | M7279          |
| Ammonium Persulfate (APS)                                                | Sigma                            | A3678          |
| N,N,N',N'-Tetramethylethylenediamine (TEMED)                             | Sigma                            | T7024          |
| 4-Hydroxy-TEMPO (H-tempo)                                                | Sigma                            | 176141         |
| N,N'-(1,2-Dihydroxyethylene)bisacrylamide (DHEBA)                        | Tokyo Chemical Industry          | D2864          |
| N,N'-Cystaminebisacrylamide (BAC)                                        | Polysciences                     | 09809          |
| Tris(2-carboxyethyl)phosphine (TCEP)                                     | Sigma                            | 646547         |
| <b>Cell and neuron culture</b>                                           |                                  |                |
| Eagle's Minimum Essential Medium (EMEM)                                  | American Type Culture Collection | 30-2003        |
| Fetal Bovine Serum                                                       | Corning                          | 35-010-CV      |
| Penicillin-Streptomycin Solution                                         | Corning                          | 30-002-CI      |
| <b>Fixation and staining</b>                                             |                                  |                |
| Paraformaldehyde                                                         | Electron Microscopy Sciences     | 15710          |
| Glutaraldehyde                                                           | Electron Microscopy Sciences     | 16020          |
| Triton X-100                                                             | Sigma                            | X100           |
| Glycine                                                                  | Sigma                            | 50046          |
| PBS 10x                                                                  | Life Technologies                | 70011-044      |
| Dextran Sulfate 50%                                                      | Millipore                        | S4030          |
| SSC 20x                                                                  | Life Technologies                | 15557          |
| Yeast tRNA                                                               | Roche                            | 10109495001    |
| Normal Donkey Serum                                                      | Jackson ImmunoResearch           | 017-000-001    |
| 1,4-Piperazinediethanesulfonic acid (PIPES)                              | Sigma                            | P1851          |
| Ethylene glycol-bis(2-aminoethylether)-N,N,N',N'-tetraacetic acid (EGTA) | Sigma                            | E38889         |
| Magnesium chloride                                                       | Sigma                            | M8266          |
| <b>Digestion</b>                                                         |                                  |                |
| Proteinase K                                                             | New England Biolabs              | P8107S         |
| Ethylenediaminetetraacetic acid                                          | Sigma                            | EDS            |
| Guanidine HCl                                                            | Sigma                            | G3272          |
| Tris-HCl, 1M pH 8.0                                                      | Life Technologies                | AM9855         |
| <b>STORM imaging</b>                                                     |                                  |                |
| $\beta$ -Mercaptoethanol                                                 | Sigma                            | M3148          |
| Glucose oxidase                                                          | Sigma                            | G2133          |
| Catalase                                                                 | Sigma                            | C100           |
| Glucose                                                                  | Sigma                            | G7528          |

**Supplementary Table 2. DNA with a 5' amine modification**

| Name         | Sequence                      | Modifications |
|--------------|-------------------------------|---------------|
| A1' 5' amine | AA CCG AAT ACA AAG CAT CAA CG | 5' Amine      |
| A2' 5' amine | AA GGT GAC AGG CAT CTC AAT CT | 5' Amine      |
| A3' 5' amine | AA GTC CCT GCC TCT ATA TCT CC | 5' Amine      |
| B1' 5' amine | AA TAC GCC CTA AGA ATC CGA AC | 5' Amine      |
| C1' 5' amine | AA GAC CCT AAG CAT ACA TCG TC | 5' Amine      |

**Supplementary Table 3. DNA bearing a gel-anchoring moiety**

| Name                     | Sequence                     | Modifications         |
|--------------------------|------------------------------|-----------------------|
| A1 5'acrydite 3'alexa488 | CG TTG ATG CTT TGT ATT CGG T | 5'Acrydite 3'Alexa488 |
| A2 5'acrydite            | AG ATT GAG ATG CCT GTC ACC   | 5'Acrydite            |
| A3 5'acrydite            | GG AGA TAT AGA GGC AGG GAC   | 5'Acrydite            |
| B1 5'acrydite            | GT TCG GAT TCT TAG GGC GTA   | 5'Acrydite            |
| C1 5'acrydite            | GA CGA TGT ATG CTT AGG GTC   | 5'Acrydite            |

**Supplementary Table 4. DNA for 2<sup>nd</sup> expansion (no signal amplification)**

| Name                      | Sequence                   | Modifications         |
|---------------------------|----------------------------|-----------------------|
| A1' 5'acrydite 3'atto565  | CCG AAT ACA AAG CAT CAA CG | 5'Acrydite 3'Atto565  |
| C1' 5'acrydite 3'alexa488 | GAC CCT AAG CAT ACA TCG TC | 5'Acrydite 3'Alexa488 |

**Supplementary Table 5. Linker DNA for DNA hybridization-based signal amplification (see Supplementary Fig. 10)**

| Name                | Sequence                                                                                                                              | Modifications |
|---------------------|---------------------------------------------------------------------------------------------------------------------------------------|---------------|
| A3' 4A1' 5'acrydite | GT CCC TGC CTC TAT ATC TCC ATA CCG AAT ACA AAG CAT CAA TAC CGA ATA CAA AGC ATC AAT ACC GAA TAC AAA GCA TCA ATA CCG AAT ACA AAG CAT CA | 5'Acrydite    |
| B1' 4B2' 5'acrydite | AT ACG CCC TAA GAA TCC GAA ATA GCA TTA CAG TCC TCA TAA TAG CAT TAC AGT CCT CAT AAT AGC ATT ACA GTC CTC ATA ATA GCA TTA CAG TCC TCA TA | 5'Acrydite    |
| C1' 4C2' 5'acrydite | AG ACC CTA AGC ATA CAT CGT ATA GAC TAC TGA TAA CTG GAA TAG ACT ACT GAT AAC TGG AAT AGA CTA CTG ATA ACT GGA ATA GAC TAC TGA TAA CTG GA | 5'Acrydite    |

**Supplementary Table 6. Fluorophore-tagged DNA for DNA hybridization-based signal amplification (See Supplementary Fig. 10)**

| Name          | Sequence                     | Modifications |
|---------------|------------------------------|---------------|
| A1 3'alexa488 | CG TTG ATG CTT TGT ATT CGG T | 3'Alexa488    |
| B2 3'atto565  | ACT TAT GAG GAC TGT AAT GCT  | 3'Atto565     |
| C2 3'atto647N | CAA TCC AGT TAT CAG TAG TCT  | 3'Atto647N    |

**Supplementary Table 7. Linker DNA for LNA hybridization-based signal amplification (see Supplementary Fig. 10)**

| Name                    | Sequence                                                                                                              | Modifications |
|-------------------------|-----------------------------------------------------------------------------------------------------------------------|---------------|
| A2' 4LNA-A1' 5'Acrydite | GG TGA CAG GCA TCT CAA TCT ATT ACA AAG CAT CAA CGA TTA CAA AGC ATC AAC GAT TAC AAA GCA TCA ACG ATT ACA AAG CAT CAA CG | 5'Acrydite    |
| A3' 4LNA-A1' 5'Acrydite | GT CCC TGC CTC TAT ATC TCC ATT ACA AAG CAT CAA CGA TTA CAA AGC ATC AAC GAT TAC AAA GCA TCA ACG ATT ACA AAG CAT CAA CG | 5'Acrydite    |
| B1' 4LNA-B2' 5'Acrydite | TA CGC CCT AAG AAT CCG AAC ATG CAT TAC AGC CCT CAA TGC ATT ACA GCC CTC AAT GCA TTA CAG CCC TCA ATG CAT TAC AGC CCT CA | 5'Acrydite    |

**Supplementary Table 8. DNA for triple round expansion**

| Name              | Sequence                                                 | Modifications |
|-------------------|----------------------------------------------------------|---------------|
| B1' A2 5'acrydite | TA CGC CCT AAG AAT CCG AAC ATA GAT TGA GAT GCC TGT CAC C | 5'Acrydite    |

**Supplementary Table 9. Fluorophore-tagged LNA for LNA hybridization-based signal amplification (see Supplementary Fig. 10) (underlined letters: LNA)**

| Name               | Sequence                                       | Modifications |
|--------------------|------------------------------------------------|---------------|
| LNA-A1 3' Atto565  | <u>CGT</u> <u>TGAT</u> <u>GCTTT</u> <u>GTA</u> | 3' Atto565    |
| LNA-B2 3' Atto647N | <u>TGAGGGCT</u> <u>GTAATGC</u>                 | 3' Atto647N   |

## Supplementary Table 10. Immunostaining and DNA hybridization condition

(except **Supplementary Fig. 15**; see ‘7. Triple round expansion’ of Methods)

| Figure            | Imaging method | Primary antibody                                                                   | Secondary antibody                                     | DNA hybridization after 2 <sup>nd</sup> antibody staining | DNA hybridization after re-embedding                              | DNA hybridization after 2 <sup>nd</sup> swellable gel synthesis |
|-------------------|----------------|------------------------------------------------------------------------------------|--------------------------------------------------------|-----------------------------------------------------------|-------------------------------------------------------------------|-----------------------------------------------------------------|
| Main Text Figures |                |                                                                                    |                                                        |                                                           |                                                                   |                                                                 |
| <b>2a-c</b>       | STORM          | anti-beta Tubulin (rb)                                                             | anti-Rb alexa647                                       |                                                           |                                                                   |                                                                 |
| <b>2d-n</b>       | iExM           | anti-beta Tubulin (rb)                                                             | RbA1'                                                  | A1 5'acrydite 3'alexa488                                  | A1' 5'acrydite 3'atto565                                          |                                                                 |
| <b>2o,p</b>       | STORM/iExM     | anti-beta Tubulin (rb)                                                             | RbA1'<br>anti-Rb alexa647                              | A1 5'acrydite 3'alexa488                                  | A1' 5'acrydite 3'atto565                                          |                                                                 |
| <b>3a-c</b>       | iExM           | anti-GluR1 (rb)<br>anti-Basson (ms)<br>anti-Homer1 (gp)                            | RbA3'<br>MsB1'<br>GpC1'                                | A3 5'acrydite<br>B1 5'acrydite<br>C1 5'acrydite           | A3' 4A1' 5'acrydite<br>B1' 4B2' 5'acrydite<br>C1' 4C2' 5'acrydite | A1 3'alexa488<br>B2 3'atto565<br>C2 3'atto647N                  |
| <b>3d-f</b>       | iExM           | anti-GABARA $\alpha$ 1/ $\alpha$ 2 (rb)<br>anti-Gephyrin (ms)<br>anti-Bassoon (gp) | RbA3'<br>MsB1'<br>GpC1'                                | A3 5'acrydite<br>B1 5'acrydite<br>C1 5'acrydite           | A3' 4A1' 5'acrydite<br>B1' 4B2' 5'acrydite<br>C1' 4C2' 5'acrydite | A1 3'alexa488<br>B2 3'atto565<br>C2 3'atto647N                  |
| <b>3g</b>         | iExM           | anti-GluR1 (rb)<br>anti-Homer1 (ms)                                                | RbA2'<br>MsB1'                                         | A2 5'acrydite<br>B1 5'acrydite                            | A2' 4LNA-A1' 5'acrydite<br>B1' 4LNA-B2' 5'acrydite                | LNA-A1 3'atto565<br>LNA-B2 3'atto647N                           |
| <b>3i-s</b>       | iExM           | anti-Homer1 (rb)<br>anti-Bassoon (ms)                                              | RbA2'<br>MsB1'                                         | A2 5'acrydite<br>B1 5'acrydite                            | A2' 4LNA-A1' 5'acrydite<br>B1' 4LNA-B2' 5'acrydite                | LNA-A1 3'atto565<br>LNA-B2 3'atto647N                           |
| <b>3t</b>         | iExM           | anti-Homer1 (rb)<br>anti-mCherry (rt)                                              | RbA2'<br>RtC1'                                         | A2 5'acrydite<br>C1 5'acrydite                            | A2' 4LNA-A1' 5'acrydite<br>C1' 5'acrydite 3'alexa488              | LNA-A1 3'atto565                                                |
| <b>3u</b>         | iExM           | anti-Homer1 (rb)<br>anti-GFP (chk) <sup>+</sup>                                    | RbA2'<br>ChkC1'                                        | A2 5'acrydite<br>C1 5'acrydite                            | A2' 4LNA-A1' 5'acrydite<br>C1' 5'acrydite 3'alexa488              | LNA-A1 3'atto565                                                |
| <b>4a</b>         |                | anti-GFP (chk) <sup>+</sup><br>anti-mTFP (rt)<br>anti-TagRFP (gp) <sup>*</sup>     | anti-Chk alexa488<br>anti-Rt alexa546<br>anti-Gp CF633 |                                                           |                                                                   |                                                                 |
| <b>4b</b>         | ProExM         | anti-GFP (chk) <sup>+</sup><br>anti-mTFP (rt)<br>anti-TagRFP (gp) <sup>*</sup>     | anti-Chk alexa488<br>anti-Rt alexa546<br>anti-Gp CF633 |                                                           |                                                                   |                                                                 |

|                                   |                          |                                                                                         |                                   |                                                 |                                                                                 |                                       |
|-----------------------------------|--------------------------|-----------------------------------------------------------------------------------------|-----------------------------------|-------------------------------------------------|---------------------------------------------------------------------------------|---------------------------------------|
| <b>4c</b>                         | iExM                     | anti-mCherry (rb)<br>anti-TagRFP (gp)*<br>anti-GFP (chk) <sup>+</sup><br>anti-mTFP (rt) | RbA2'<br>GpB1'<br>ChkC1'<br>RtC1' | A2 5'acrydite<br>B1 5'acrydite<br>C1 5'acrydite | A2' 4LNA-A1' 5'acrydite<br>B1' 4LNA-B2' 5'acrydite<br>C1' 5'acrydite 3'alexa388 | LNA-A1 3'atto565<br>LNA-B2 3'atto647N |
| <b>4d</b>                         | iExM                     | anti-mCherry (rb)<br>anti-TagRFP (gp)*<br>anti-GFP (chk) <sup>+</sup><br>anti-mTFP (rt) | RbA2'<br>GpB1'<br>ChkC1'<br>RtC1' | A2 5'acrydite<br>B1 5'acrydite<br>C1 5'acrydite | A2' 4LNA-A1' 5'acrydite<br>B1' 4LNA-B2' 5'acrydite<br>C1' 5'acrydite 3'alexa388 | LNA-A1 3'atto565<br>LNA-B2 3'atto647N |
| Supplementary Information Figures |                          |                                                                                         |                                   |                                                 |                                                                                 |                                       |
| <b>1</b>                          | hp-iExM                  | anti-beta Tubulin                                                                       | RbA1'                             | A1 5'acrydite 3'alexa488                        | A1' 5'acrydite 3'atto565                                                        |                                       |
| <b>2b</b>                         | iExM                     | anti-beta Tubulin (rb)                                                                  | RbA1'                             | A1 5'acrydite 3'alexa488                        | A1' 5'acrydite 3'atto565                                                        |                                       |
| <b>7</b>                          | iExM                     | anti-beta Tubulin (rb)                                                                  | RbA1'                             | A1 5'acrydite 3'alexa488                        | A1' 5'acrydite 3'atto565                                                        |                                       |
| <b>9</b>                          | iExM                     | anti-Homer1 (rb)<br>anti-Bassoon (ms)                                                   | MsA2'<br>RbB1'                    | A2 5'acrydite<br>B1 5'acrydite                  | A2' 4LNA-A1' 5'acrydite<br>B1' 4LNA-B2' 5'acrydite                              | LNA-A1 3'atto565<br>LNA-B2 3'atto647N |
| <b>10</b>                         | iExM                     | anti-GABARA $\alpha$ 1/ $\alpha$ 2 (rb)<br>anti-Bassoon (ms)                            | RbA2'<br>MsB1'                    | A2 5'acrydite<br>B1 5'acrydite                  | A2' 4LNA-A1' 5'acrydite<br>B1' 4LNA-B2' 5'acrydite                              | LNA-A1 3'atto565<br>LNA-B2 3'atto647N |
| <b>11</b>                         | same with <b>Fig. 4c</b> |                                                                                         |                                   |                                                 |                                                                                 |                                       |
| <b>12,13</b>                      | iExM                     | anti-mCherry (rb)<br>anti-TagRFP (gp)*<br>anti-mTFP (rt)                                | RbA2'<br>GpB1'<br>RtC1'           | A2 5'acrydite<br>B1 5'acrydite<br>C1 5'acrydite | A2' 4LNA-A1' 5'acrydite<br>B1' 4LNA-B2' 5'acrydite<br>C1' 5'acrydite 3'alexa388 | LNA-A1 3'atto565<br>LNA-B2 3'atto647N |
| <b>14</b>                         | hp-iExM                  | anti-TagRFP (gp)*<br>anti-mTFP (rt)<br>anti-GFP (chk) <sup>+</sup>                      | GpA2'<br>RtB1'<br>ChkC1'          | A2 5'acrydite<br>B1 5'acrydite<br>C1 5'acrydite | A2' 4LNA-A1' 5'acrydite<br>B1' 4LNA-B2' 5'acrydite<br>C1' 5'acrydite 3'alexa388 | LNA-A1 3'atto565<br>LNA-B2 3'atto647N |

\*anti-TagRFP antibody binds also to TagBFP.

<sup>+</sup>anti-GFP antibody binds also to EYFP.

**Supplementary Table 11. Primary and secondary antibody list**

| Primary/<br>Secondary | Target                         | Host* | Vendor**         | Product number                    | Dilution                                                                                             |
|-----------------------|--------------------------------|-------|------------------|-----------------------------------|------------------------------------------------------------------------------------------------------|
| Primary               | Beta tubulin                   | Rb    | Abcam            | ab6046                            | 1:100                                                                                                |
| Primary               | Homer1                         | Rb    | SYSY             | 160003                            | 1:200                                                                                                |
| Primary               | Homer1                         | Gp    | SYSY             | 160004                            | 1:200                                                                                                |
| Primary               | Homer1                         | Ms    | SYSY             | 160011                            | 1:200                                                                                                |
| Primary               | Bassoon                        | Ms    | Enzo             | ADI-VAM-PS003-F                   | 1:200                                                                                                |
| Primary               | Bassoon                        | Gp    | SYSY             | 141004                            | 1:200                                                                                                |
| Primary               | Gephyrin                       | Ms    | SYSY             | 147011                            | 1:200                                                                                                |
| Primary               | GABA <sub>A</sub> R $\alpha$ 1 | Rb    | SYSY             | 224203                            | 1:200                                                                                                |
| Primary               | GABA <sub>A</sub> R $\alpha$ 2 | Rb    | SYSY             | 224103                            | 1:200                                                                                                |
| Primary               | GluR1                          | Rb    | Abcam            | ab31232                           | 1:100                                                                                                |
| Primary               | TagRFP                         | Gp    | Kerafast/Cai lab | EMU107                            | 1:200                                                                                                |
| Primary               | mCherry                        | Rb    | Abcam            | ab167453                          | 1:200                                                                                                |
| Primary               | mCherry                        | Rt    | ThermoFisher     | M11217                            | 1:200                                                                                                |
| Primary               | mTFP                           | Rt    | Kerafast/Cai lab | EMU103                            | 1:200                                                                                                |
| Primary               | GFP                            | Chk   | Kerafast/Cai lab | EMU101                            | 1:400                                                                                                |
| Secondary             | Chicken                        | Gt    | ThermoFisher     | A-11039<br>(alexa 488 conjugated) | 10 $\mu$ g/uL                                                                                        |
| Secondary             | Rat                            | Gt    | ThermoFisher     | A-11081<br>(alexa 546 conjugated) | 10 $\mu$ g/uL                                                                                        |
| Secondary             | Guinea Pig                     | Gt    | Biotium          | Biotium<br>(CF633 conjugated)     | 10 $\mu$ g/uL                                                                                        |
| Secondary             | Rabbit                         | Dk    | JIR              | 711-005-152                       | 10 $\mu$ g/uL for cultured cells<br>and cultured neurons and 20<br>$\mu$ g/ $\mu$ L for brain slices |
| Secondary             | Chicken                        | Dk    | JIR              | 703-005-155                       |                                                                                                      |
| Secondary             | Rat                            | Dk    | JIR              | 712-005-153                       |                                                                                                      |
| Secondary             | Guinea Pig                     | Dk    | JIR              | 706-005-148                       |                                                                                                      |
| Secondary             | Mouse                          | Dk    | JIR              | 715-005-151                       |                                                                                                      |
| Secondary             | Rabbit                         | Dk    | ThermoFisher     | A-31573<br>(alexa 647 conjugated) | 1:100                                                                                                |

\*Host - Rb: rabbit, Ms: mouse, Gp: Guinea pig, Rt: Rat, Chk: Chicken, Gt: Goat, Dk: Donkey

\*\*Vender – SYSY: Synaptic Systems, JIR: Jackson ImmunoResearch

**Supplementary Table 12. DNA-conjugated secondary antibodies**

| Name   | Host of 2 <sup>nd</sup> antibody | Conjugated DNA |
|--------|----------------------------------|----------------|
| RbA1'  | Rabbit                           | A1' 5'amine    |
| RbA2'  | Rabbit                           | A2' 5'amine    |
| RbA3'  | Rabbit                           | A3' 5'amine    |
| RbB1'  | Rabbit                           | B1' 5'amine    |
| MsA2'  | Mouse                            | A2' 5'amine    |
| MsB1'  | Mouse                            | B1' 5'amine    |
| GpA2'  | Guinea pig                       | A2' 5'amine    |
| GpB1'  | Guinea pig                       | B1' 5'amine    |
| GpC1'  | Guinea pig                       | C1' 5'amine    |
| RtB1'  | Rat                              | B1' 5'amine    |
| RtC1'  | Rat                              | C1' 5'amine    |
| ChkC1' | Chicken                          | C1' 5'amine    |

**Supplementary Table 13. Gel solution of hp-iExM and iExM**

|                                 | Pre-gel Incubation solution | 1 <sup>st</sup> gel solution | Re-embedding solution | hp-iExM 2 <sup>nd</sup> gel solution | iExM 2 <sup>nd</sup> gel solution |
|---------------------------------|-----------------------------|------------------------------|-----------------------|--------------------------------------|-----------------------------------|
| Sodium acrylate                 | 8.625% (w/w)                | 8.625% (w/w)                 | 0                     | 0                                    | 8.625% (w/w)                      |
| Acrylamide                      | 2.5% (w/w)                  | 2.5% (w/w)                   | 10% (w/w)             | 10% (w/w)                            | 2.5% (w/w)                        |
| Crosslinker                     | DHEBA<br>0.2% (w/w)         | DHEBA<br>0.2% (w/w)          | DHEBA<br>0.2% (w/w)   | BIS<br>0.15% (w/w)                   | BIS<br>0.15% (w/w)                |
| APS                             | 0                           | 0.2% (w/w)                   | 0.05% (w/w)           | 0.05% (w/w)                          | 0.05% (w/w)                       |
| TEMED                           | 0                           | 0.2% (v/w)                   | 0.05% (v/w)           | 0.05% (v/w)                          | 0.05% (v/w)                       |
| NaCl                            | 1.865M                      | 1.865M                       | 0                     | 0                                    | 2M                                |
| PBS                             | 1x                          | 1x                           | 0                     | 0.15x                                | 1x                                |
| H-tempo                         | 0                           | 0.005%                       | 0                     | 0                                    | 0                                 |
| Incubation/gelation temperature | 4 °C                        | 37 °C                        | 37 °C                 | Room temperature                     | 37 °C                             |
| Incubation/gelation duration    | Overnight (12 hours)        | 3 hours                      | 1.5 hours             | 1.5 hours                            | 1.5 hours                         |

**Supplementary Table 14. Gel solution for triple round expansion**

|                                 | Pre-gel Incubation solution | 1 <sup>st</sup> gel solution | 1 <sup>st</sup> Re-embedding solution | 2 <sup>nd</sup> gel solution | 2 <sup>nd</sup> re-embedding solution | 3 <sup>rd</sup> gel solution |
|---------------------------------|-----------------------------|------------------------------|---------------------------------------|------------------------------|---------------------------------------|------------------------------|
| Sodium acrylate                 | 8.625% (w/w)                | 8.625% (w/w)                 | 0                                     | 8.625% (w/w)                 | 0                                     | 8.625% (w/w)                 |
| Acrylamide                      | 2.5% (w/w)                  | 2.5% (w/w)                   | 10% (w/w)                             | 2.5% (w/w)                   | 10% (w/w)                             | 2.5% (w/w)                   |
| Crosslinker                     | BAC<br>0.2% (w/w)           | BAC<br>0.2% (w/w)            | BAC<br>0.2% (w/w)                     | DHEBA<br>0.2% (w/w)          | DHEBA<br>0.2% (w/w)                   | BIS<br>0.15% (w/w)           |
| APS                             | 0                           | 0.2% (w/w)                   | 0.05% (w/w)                           | 0.05% (w/w)                  | 0.05% (w/w)                           | 0.05% (w/w/)                 |
| TEMED                           | 0                           | 0.2% (v/w)                   | 0.05% (v/w)                           | 0.05% (v/w)                  | 0.05% (v/w)                           | 0.05% (v/w)                  |
| NaCl                            | 1.11M                       | 0.89M                        | 0                                     | 2M                           | 0                                     | 2M                           |
| PBS                             | 1x                          | 1x                           | 0                                     | 1x                           | 0                                     | 1x                           |
| H-tempo                         | 0                           | 0.005%                       | 0                                     | 0                            | 0                                     | 0                            |
| Incubation/Gelation temperature | 4 °C                        | 37 °C                        | 37 °C                                 | 37 °C                        | 37 °C                                 | 37 °C                        |
| Incubation/Gelation duration    | Overnight (12 hours)        | 3 hours                      | 1.5 hours                             | 1.5 hours                    | 1.5 hours                             | 1.5 hours                    |

**Supplementary Note 1. Expansion factor:** We found that iExM would typically result in expansion ratios of ~4.5x (with 0.005% H-TEMPO inhibitor; see Methods for details) to ~5.5x (with 0.01% H-TEMPO) in the first round, and ~4x in the second round, for a total increase of ~16x-22x. hp-iExM resulted in ~4.5x (with 0.005% H-TEMPO) to ~5.5x (with 0.01% H-TEMPO) expansion ratios in the first round of expansion, followed by ~3.5x in the second round, for a total increase of ~14-19x.

**Supplementary Note 2. Details of the iExM simulator:** We developed a computer simulation of how microtubules would look when they were labeled with a primary antibody and a DNA-conjugated secondary antibody, and then expanded 20-fold via iExM (**Supplementary Fig. 2**). We first calculated the point spread function (PSF) of the microscope system we used (a spinning disk confocal microscope with a pinhole size of 50  $\mu\text{m}$  equipped with a 40x NA1.15 objective lens), as shown in **Supplementary Fig. 2a**. We positioned points in a cylinder between two shells, with inner and outer radius  $R_i$  and  $R_o$  respectively. The points in the cylinder simulate the distribution of the 5' acrydites of the DNA anchored to the first polymer of iExM. This DNA is anchored to the hydrogel through its 5' acrydite, and then a complementary DNA with a fluorophore is finally hybridized to this gel-anchored DNA, for incorporation into the final gel. These points were randomly positioned inside the cylinder to simulate the stochastic nature of the antibody binding to its target protein. We then convolved the PSF with the points in the cylinder to construct a final image of a microtubule. See section 'MATLAB simulation of iExM images' of the Methods for details of calculating  $R_i$  and  $R_o$ . A simulated cylinder with an inner radius of the average  $R_i$  and outer radius of the average  $R_o$  (green dots, **Supplementary Fig. 2c, 2d**) was generated and super-imposed onto the experimental results (red dots). When we analyzed 129 microtubule segments (from one culture), the average  $R_i$  was  $26.7 \pm 5.6$  nm (mean  $\pm$  standard deviation) and the average  $R_o$  was  $33.5 \pm 2.1$  nm, as shown in **Supplementary Fig. 2e**. The average thickness of the 5' acrydite layer was  $6.8 \pm 3.6$  nm, as shown in **Supplementary Fig. 2f**.

**Supplementary Note 3. Positional error of proteins labeled with DNA-conjugated secondary antibodies:** We can (**Supplementary Fig. 4**) calculate the positional error when a DNA-conjugated secondary antibody is used instead of a regular secondary antibody to label a protein complex on two sides, as shown in **Supplementary Fig. 4c** and **d**. The peak-to-peak distance would be 60.2 nm (**Supplementary Fig. 4c** and green trace in **d**); taking the peak to be at the center of the DNA layer, estimated using the calculations of **Supplementary Fig. 2e**, or  $2 \times (26.7+33.5)/2$ , which is 9.2 nm larger than the peak-to-peak distance (51 nm) measured by immunostaining with regular secondary antibodies. So, the DNA-conjugated antibody adds 4.6 nm ( $9.2/2=4.6$  nm per epitope) of positional error to a protein complex vs. when labeled with regular secondary antibodies if the antibodies bind to the target protein asymmetrically, as in **Supplementary Figure Fig. 4a** and **d**.

**Supplementary Note 4. New probe designs with a smaller probe size:** In our experiments, a secondary antibody conjugated with a 7-nm long strand of DNA was used (**Supplementary Fig. 5a**). As this DNA-antibody complex is larger than a regular secondary antibody (**Supplementary Fig. 5b**), the use of a DNA-conjugated antibody adds another 4.6 nm positional error to a typical measurement, as discussed in **Supplementary Fig. 4**. We schematized (**Supplementary Fig. 5**) three options to make the DNA-conjugated secondary antibody smaller. First, a shorter strand of DNA could be used (**Supplementary Fig. 5c**). To prevent the melting of shorter double strand DNA oligos, a buffer with a higher salt concentration could be used. Second, the position of an acrydite moiety could be changed from the far end of the DNA to the proximal end (**Supplementary Fig. 5d**). Thirdly, a single stranded DNA oligo with an acrydite moiety could be conjugated to the secondary antibody directly. As the persistence length of single stranded DNA is much shorter than double stranded DNA<sup>2</sup>, the distance from the surface of the secondary antibody to the acrydite would be shorter than the current design (**Supplementary Fig. 5e**). All three options presented here use only commercially available reagents, and would not require additional modification to the current iterative expansion microscopy protocol. To minimize such positional errors further, one could use nanobodies (camelid nanobodies, or F(ab) fragments of secondary antibodies) and/or direct conjugation of DNA to a primary antibody. By combining these two options (antibody fragments or direct conjugation of DNA to primary antibodies) with the three options for DNA-antibody conjugation strategies presented above, iExM with much smaller structural errors might be possible.

**Supplementary Note 5. Resolution measurement:** We estimated the point spread function (PSF) of iExM by measuring the full width at half maximum (FWHM) of single microtubule sidewalls, deriving a value of  $25.8 \pm 7.7$  nm (**Supplementary Fig. 6a**). This number was comparable to the FWHM of single microtubule sidewalls measured by other super-resolution microscopies (16-25 nm for 4Pi single-molecule switching nanoscopy (4PiSMSN) imaging of microtubules with a regular secondary antibody<sup>4</sup> and 21-27 nm for buffer-enhanced STORM imaging of microtubules with an antibody fragment<sup>5</sup>). We estimated the point spread function (PSF) of iExM independent of the labels (primary antibody and DNA-conjugated secondary antibody) by deconvolving images of microtubule sidewalls by idealized microtubules (generated according to the model of **Supplementary Fig. 3**) bearing primary antibodies and DNA-conjugated secondaries (but not modeling the blur due to optical diffraction). This yielded a value of  $22.3 \text{ nm} \pm 5.3 \text{ nm}$  (**Supplementary Fig. 6b**) for the contribution to the PSF due to the gelation, expansion, and optical imaging processes.

In iterative expansion microscopy, specimens are expanded 20-fold, but the microscope resolution is not improved by exactly 20-fold because the gelation and expansion process may introduce error. We can estimate the magnitude of this error by simulating (using the iExM simulator described in **Supplementary Fig. 2**, which includes optical blur due to diffraction) the FWHM of single microtubule sidewalls; we obtain  $19.4 \pm 1.4$  nm for this FWHM, which models the case where microtubules are labeled with a primary antibody and DNA-conjugated secondary antibody and then expanded 20-fold without gel-related error (**Supplementary Fig. 6a**). Thus, the experimental PSF (25.8 nm, **Supplementary Fig. 6a**) is  $\sim 6$  nm larger than the simulated value. Why is this? Before expansion, polymer chains form a dense polymer network with a mesh size of a few nanometers (small angle x-ray scattering measurements of similar gels suggest a mesh size of

1-2 nm, ref. <sup>6</sup>). During gelation and expansion, the 5' acrydite moieties would be anchored to nearby polymer chains, which would “coarse grain” the set of possible acrydite anchoring points (since acrydites could not be anchored at a point in space unless a gel chain was present). During expansion itself, gels may not move perfectly evenly, as well. Such broadening would not greatly alter the mean peak-to-peak distance between target proteins arranged in a stereotyped complex, because the errors of 5'acrydite tags would be averaged out in the final images (**Supplementary Fig. 6c**). However, these gel effects would broaden the PSF of iExM by randomly moving 5'acrydite tags from their initial positions.

To gauge the impact of such errors on our original simulation (**Supplementary Fig. 2**), we incorporated errors of this scale into the simulation of **Supplementary Fig. 2**, by randomly moving 5' acrydites in the cylinder by 5-10 nm relative to their initial positions and performing the simulation of **Supplementary Fig. 2a** again. As shown in **Supplementary Fig. 6c**, an additional 5-10 nm positional error did not greatly alter the overall microtubule profile, shifting the peak-to-peak distance between the sidewalls by a few nanometers.

**Supplementary Note 6. Expansion uniformity:** Expansion uniformity across length scales of tens to hundreds of nanometers can be estimated by analyzing how the microtubule diameter varies along the long axis of the microtubule. Before expansion, this variation would be a result of two factors: variation in the actual microtubule diameter along the microtubule long axis before expansion, and variation in the thickness of the primary and secondary antibody layers along the microtubule long axis. If expansion was perfectly uniform, then the variation in the microtubule diameter along the microtubule long axis after expansion would be the pre-expansion variation, scaled up by the expansion factor. However, if the expansion was not uniform, then this variation might be larger than expected from a simple scaling.

By comparing the standard deviation of the microtubule diameter along the microtubule long axis as measured in STORM imaging vs. iExM imaging, we can calculate the nonuniformity of expansion across length scales of tens to hundreds of nanometers. The standard deviation of the peak-to-peak sidewall distances measured by STORM, over distances of 400 nm along the microtubule axis, was 4.7 nm ( $n = 110$  from two cultures). This standard deviation was 10.3 nm (in scaled-down-to-pre-expansion units) when measured by iExM imaging of cultured cells ( $n = 307$  from one cultures), and 10.5 nm when measured by hp-iExM imaging of cultured cells. The difference of variances between iExM and STORM ( $(10.3^2 - 4.7^2)^{1/2} = 9.2$  nm deviation) could be attributed to the extra DNA layer used in ExM but not STORM, as well as any non-uniformity of expansion. We calculated this standard deviation of post-expansion sidewall distances of microtubules in tissues, obtaining 13.5 nm for the brain ( $n = 96$  from one samples), 11.5 nm for the lung ( $n = 55$  from one samples), and 13.6 nm for the liver ( $n = 95$  from one samples). The difference of variances (e.g.,  $(13.6^2 - 4.7^2)^{1/2} = 12.8$  nm deviation for the liver) again would be attributed to the iExM-specific properties – the DNA layer and non-uniform expansion. It is nontrivial to precisely separate the effects of DNA layer and non-uniform expansion from these measurements and calculations.

**Supplementary Note 7. Discussion on the size of the linker DNA:** For DNA amplification (**Supplementary Fig. 8**), the final expansion occurred in 0.2x PBS to maintain DNA hybridization, although this resulted in less expansion than distilled (DI) water. For LNA, the second gel was expanded in DI water, enabling full expansion, and made possible by the strong hybridization between LNA and DNA which survives immersion in DI water<sup>3</sup>. The use of a long linker DNA, and then hybridizing multiple DNA or LNA strands to the linker DNA, would not add a large error to the location of biological targets, as the DNA and LNA strands are hybridized to the linker DNA after the 2<sup>nd</sup> expansion, so that the effective positional error, calculated by dividing the positional error by the expansion factor, is negligible (for example, the length of a fully stretched 100-bp linker DNA is expected to be around 33 nm, but the effective positional error caused by this linker DNA would be only  $33 / 20 \sim 1.7$  nm).

**Supplementary Note 8. Triple round expansion:** We designed a triple expansion protocol (**Supplementary Fig. 15**) where the first swellable gel uses the disulfide-containing crosslinker N,N'-cystaminebisacrylamide (which can be cleaved with tris(2-carboxyethyl)phosphine (TCEP)), the second swellable gel uses the diol-containing crosslinker DHEBA (which can be cleaved with NaOH), and the third swellable gel uses the standard crosslinker BIS (which is resistant to both TCEP and NaOH). We expect that a challenge to using iterative expansion microscopy with a larger expansion factor (>50 fold) would be validating the nanoscale expansion uniformity. To validate 20-fold expansion, we used microtubules as molecular rulers, but even smaller structures would be required to validate the resolution of 50-fold expansion. One possible option would be DNA origami, as a wide range of DNA origami structures are available<sup>7</sup> and large probes (e.g., antibodies) are not required to anchor them to the gel.

## References

1. Weber, K., Rathke, P. C. & Osborn, M. Cytoplasmic microtubular images in glutaraldehyde-fixed tissue culture cells by electron microscopy and by immunofluorescence microscopy. *Proc. Natl. Acad. Sci.* **75**, 1820–1824 (1978).
2. Chi, Q., Wang, G. & Jiang, J. The persistence length and length per base of single-stranded DNA obtained from fluorescence correlation spectroscopy measurements using mean field theory. *Phys. A Stat. Mech. its Appl.* **392**, 1072–1079 (2013).
3. K. Singh, S., A. Koshkin, A., Wengel, J. & Nielsen, P. LNA (locked nucleic acids): synthesis and high-affinity nucleic acid recognition. *Chem. Commun.* 455–456 (1998). doi:10.1039/A708608C
4. Huang, F. *et al.* Ultra-High Resolution 3D Imaging of Whole Cells. *Cell* **166**, 1028–1040 (2017).
5. Olivier, N., Keller, D., Gönczy, P. & Manley, S. Resolution doubling in 3D-STORM imaging through improved buffers. *PLoS One* **8**, e69004 (2013).
6. Cohen, Y., Ramon, O., Kopelman, I. J. & Mizrahi, S. Characterization of inhomogeneous polyacrylamide hydrogels. *J. Polym. Sci. Part B Polym. Phys.* **30**, 1055–1067 (1992).
7. Veneziano, R. *et al.* Designer nanoscale DNA assemblies programmed from the top down. *Science (80-. )*. **352**, 1534 LP-1534 (2016).
